# Supplementary material
Source: Elsevier journal article supplement (https://www.sciencedirect.com/science/article/pii/S2605153222000851)
Supplement: mmc1 [file S2605153222000851:mmc1.doc]

**Tabla 1 del material adicional.** Cuestionario de seguridad de estudiantes de medicina

| Categoría | **Ítems** |
| --- | --- |
| Entrenamiento recibido en seguridad del paciente | 1. Mi entrenamiento me está preparando para entender las causas del error en medicina. 2. Como resultado de mi formación de pregrado, tengo una buena comprensión de las cuestiones de seguridad del paciente. 3. Mi entrenamiento me está preparando para prevenir errónea en medicina. |
| Confianza en el reporte del error | 1. Me sentiría cómodo reportando cualquier error que haya cometido, sin importar cuán serios haya sido los resultados para el paciente. 2. Me sentiría cómodo reportando cualquier error que otras personas hayan cometido, sin importar cuan serios los resultados para el paciente. 3. Estoy seguro de que podría hablar abiertamente con mi supervisor acerca de un error que yo haya cometido si el mismo resultó en daño potencial o real a mi paciente. |
| Horas de trabajo como causa de error | 1. Turnos de trabajo más cortos para los médicos, reducirán los errores en medicina. 2. Al no tomar descansos regulares los turnos los médicos aumentan el riesgo de cometer errores. 3. El número de horas que trabajan los médicos aumenta la probabilidad de cometer errónea en medicina. |
| Inevitabilidad del error | 1. Incluso los médicos más experimentados y competentes cometen errores. 2. Un verdadero profesional no comete errores. 3. El error humano es inevitable. |
| Incompetencia profesional como causa de error | 1. La mayoría de los errores en medicina derivan de enfermeros descuidados. 2. Si las personas prestaran más atención en el trabajo, los errores en medicina serían evitados. 3. La mayoría de los errores de medicina derivan en médicos descuidados. 4. Los errores en medicina son un signo de incompetencia. |
| Responsabilidad en la comunicación | 1. No es necesario reportar errores que no resulten en eventos adversos para el paciente. 2. Los médicos tienen la responsabilidad de comunicar el error al paciente solo si el mismo resultó en daño para ese paciente. 3. Todos los errores en medicina deberían ser reportados. |
| Funcionamiento del equipo | 1. Un mejor trabajo en equipo multidisciplinario reducirá los errores en medicina. 2. Enseñar habilidades de trabajo en equipo reducirá los errores en medicina. |
| Compromiso del paciente en la reducción del error | 1. Los pacientes tienen un rol importante en la prevención del error en medicina. 2. Estimular a los pacientes a estar más involucrados en su cuidado, puede ayudar a reducir el riesgo de que ocurran los errores en medicina. |
| Importancia de la seguridad del paciente en el curriculum | 1. Enseñar a los estudiantes sobre seguridad del paciente, debería ser una prioridad en el entrenamiento médico de pregrado. 2. Las cuestiones en seguridad del paciente no pueden ser enseñadas y solo pueden ser aprendidas mediante la experiencia clínica luego de la graduación. 3. Aprender sobre seguridad del paciente antes de graduarme me permitirá convertirme en un médico más efectivo. |

Cuestionario de seguridad de estudiantes de medicina. Cada ítem recibe una puntuación, según la escala de Likert. Los valores se puntúan desde 1 (en desacuerdo total) hasta 7 (de acuerdo en su totalidad), pasándose por 4 como valor neutral.

**Tabla 2 del material adicional.** Cuestionario TEAM

| Identificación del equipo: | | | | |
| --- | --- | --- | --- | --- |
| Señala: | Observador | Participante activo | Instructor | Técnico |
| Nombre del grupo: | | | | |
| Señala el número del escenario: 1 2 3 4 5 6 7 8 | | | | |
| Líder del equipo (número asignado anónimo): | | | | |

| Liderazgo: Se asume que el líder del equipo ha sido designado, ha surgido, o es el profesional de mayor experiencia. Si no surgió ningún líder, por favor otorgue un 0 a las preguntas 1 y 2. |
| --- |
| 1. El líder del equipo hizo saber a los miembros del equipo que se esperaba de ellos guiándoles y estableciendo directrices. |
| 1. El líder del equipo mantuvo una perspectiva global. *Por ejemplo, ¿monitorizó los procesos clínicos y del entrono? ¿Se mantuvo al margen cuando fue posible? ¿Delegó tareas de forma apropiadas?* |
| Trabajo en equipo: Las calificaciones deberían considerar al equipo al completo, es decir, al líder y a su equipo como un colectivo a medida en la que sea posible. |
| 1. ¿Se comunicaron de forma efectiva los miembros del equipo? *Por ejemplo, a través del lenguaje verbal, el no-verbal y otras formas de comunicación por escrito* |
| 1. El equipo trabajó conjuntamente para completar las tareas a tiempo. |
| 1. ¿Actuó el equipo mantenimiento la compostura y el control? *Por ejemplo, ¿fue aplicable a las emociones?, ¿surgió algún problema durante la gestión de conflictos?* |
| 1. La actitud general del grupo fue positiva. *Ejemplo: apoyo necesario, confianza, actitud, optimismo y determinación.* |
| 1. El equipo se adaptó a las situaciones cambiantes. *Por ejemplo: ¿Hubo adaptación entre los diferentes roles de sus profesiones? Cambios en la situación: ¿Deterioro del paciente? ¿Cambios del equipo?* |
| 1. El equipo monitorizó y reevaluó la situación |
| 1. El equipo anticipó posibles acontecimientos. *Por ejemplo: preparando el desfibrilador, la medicación y el material de vía aérea.* |
| Gestión de tareas |
| 1. El equipo priorizó las tareas. |
| 1. El equipo siguió las guías y los estándares considerados. *Ejemplo: ¿Algún tipo de desviación de estos se considerará apropiada?* |
| Evaluación general |
| En una escala de 1 a 10. Otorgue una calificación global  de las habilidades no técnicas del equipo. |

Cuestionario TEAM. Cada ítem recibe una puntuación, según la escala de Likert. Los valores se puntúan desde cero (nuca/casi nunca) hasta cuatro (siempre/casi siempre), pasándose por dos como valor neutral.

**Tabla 3 del material adicional.** Cuestionario DASH

| CLASIFICACIÓN | DESCRIPCIÓN |
| --- | --- |
| 1. Establece unos objetivos de aprendizaje atractivos | * Aclara los objetivos del curso, el entorno, la confidencialidad, el papel y las expectativas  * Establece un "contrato de ficción" con los participantes  * Se ocupa de los detalles logísticos  * Transmite respeto por los alumnos y preocupación por su seguridad psicológica |
| 2. Mantener un entorno de aprendizaje atractivo | * Aclara los objetivos, las funciones y las expectativas de la sesión informativa  * Anima a los alumnos a expresar sus reacciones y, si es necesario, les orienta sobre lo que ha ocurrido en la simulación, cerca del principio  * Guía de análisis del rendimiento de los trainings durante la mitad de la sesión  * Colabora con los participantes para resumir el aprendizaje de la sesión cerca del final |
| 3. Estructurar el informe de forma organizada | * Aclara los objetivos, las funciones y las expectativas de la sesión informativa  * Anima a los alumnos a expresar sus reacciones y, si es necesario, les orienta sobre lo que ha ocurrido en la simulación, cerca del principio  * Guías de análisis del rendimiento de los trainings durante la mitad de la sesión  * Colabora con los participantes para resumir el aprendizaje de la sesión cerca del final |
| 4. Provocar un debate interesante | * Utiliza ejemplos y resultados concretos como base para la investigación y el debate  * Revela su propio razonamiento y juicio  * Facilita el debate mediante técnicas verbales y no verbales  * Utiliza dispositivos de vídeo, reproducción y revisión (si están disponibles)  * Reconoce al participante molesto |
| 5. Identifica y explora las deficiencias de rendimiento | * Proporciona información sobre el rendimiento  * Explora el origen del déficit de rendimiento |
| 6. Ayuda a los alumnos a conseguir o mantener un buen rendimiento en el futuro | * Ayuda a cerrar la brecha de rendimiento a través de la discusión y la enseñanza  * Demuestra un firme conocimiento del tema  * Cumple los objetivos importantes de la sesión |

Cuestionario DASH. Cada ítem recibe una puntuación, según la escala de Likert. Los valores se puntúan desde 1 (extremadamente inefectivo/perjudicial) hasta 7 (extremadamente efectivo/sobresaliente), pasándose por 4 como valor neutral.

**Tabla 4 del material adicional.** Cuestionario SVEST

| **Subescalas del SVEST** |
| --- |
| **1- Sufrimiento psicológico** |
| He experimentado vergüenza por estos casos. |
| Mi participación en este tipo de casos ha hecho que tenga miedo a incidentes futuros. |
| Mis experiencias me han hecho sentir triste. |
| Me siento profundamente arrepentido por haber estado involucrado en este tipo de eventos en el pasado. |
| **2- Sufrimiento Físico** |
| La carga mental que me produce la experiencia vivida es agotadora. |
| Mi experiencia en estos sucesos me ha ocasionado problemas con el sueño. |
| El estrés de estas situaciones me hace sentir náuseas o mareos. |
| Pensar en estas situaciones hace que se me quite el apetito. |
| **3- Apoyo de los compañeros de trabajo** |
| Agradezco los intentos de mis compañeros de trabajo de consolarme, pero sus esfuerzos pueden venir en un momento equivocado. |
| Hablar de lo sucedido con mis compañeros de trabajo me proporciona sensación de alivio. |
| Mis compañeros/as pueden ser indiferentes al impacto que estas situaciones han tenido en mí. |
| Mis compañeros de trabajo me han ayudado a sentir que sigo siendo un buen profesional sanitario a pesar de los errores. |
| **4- Apoyo del supervisor** |
| Siento que mi supervisor me trata de manera apropiada tras estos acontecimientos. |
| Las respuestas de mi supervisor son justas. |
| Mi supervisor culpa a las personas del equipo cuando ocurren estos casos. |
| Siento que, al evaluar estas situaciones mi supervisor tiene en cuenta la complejidad de las prácticas de atención al paciente. |
| **5- Apoyo institucional** |
| Mi institución comprende que quienes están involucrados en estos casos pueden necesitar ayuda para procesar y resolver cualquier consecuencia que pueda tener sobre los profesionales sanitarios. |
| Mi institución ofrece una variedad de recursos para ayudarme a superar las consecuencias de mi participación en estos casos. |
| El concepto de preocupación por el bienestar de los que se han visto implicados en estas situaciones no es muy fuerte en mi institución. |
| **6- Apoyo no relacionado con el trabajo** |
| Busco apoyo emocional en amigos y familiares cercanos tras suceder alguna de estas situaciones |
| El amor de mis amigos y familiares más cercanos me ayuda a superar estos sucesos* |
| **7- Autoeficacia profesional** |
| Tras mi implicación en alguno de estos eventos, he experimentado sentimientos de incompetencia con relación a mis habilidades para la asistencia y cuidado de los pacientes. |
| La experiencia vivida hace que me pregunte si realmente soy un buen profesional sanitario |
| Después de estas experiencias, he tenido miedo a intentar procedimientos difíciles o de alto riesgo |
| Estas situaciones no hacen que me cuestione mis habilidades profesionales |
| **1- Intención de cambio de trabajo** |
| Mi experiencia con estos casos me ha hecho tener deseos de ocupar un puesto de trabajo fuera de la atención al paciente. |
| A veces, el estrés de estar involucrado en estas situaciones me hace querer dejar mi trabajo |
| **2- Absentismo** |
| La experiencia vivida con un evento adverso o error médico me ha llevado a tomarme un día libre para mi salud mental y poder recuperarme. |
| Me he tomado unos días libres después de que ocurriera alguno de estos casos. |

Cuestionario SVEST: Para obtener la puntuación de las 7 dimensiones y las variables resultado se utiliza una escala Likert de 5 puntos, con una puntuación que va desde el 1 («totalmente en desacuerdo») hasta 5 («totalmente de acuerdo»).

**Tabla 5 del material adicional.** Cuestionario PCL5

| Ítems |
| --- |
| ID: |
| Estado de ejecución: |
| 1. Fecha de nacimiento |
| 1. Sexo: |
| 1. Residente, *Fellow* o Adjunto |
| 3.1 Indique año de residencia |
| 3.2 Indique los años como Adjunto |
| 1. Hospital en el que trabaja |
|  |
| Dimensión 1 - Sufrimiento psicológico |
| Dimensión 2 - Sufrimiento físico |
| Dimensión 3 - Apoyo de los compañeros de trabajo |
| Dimensión 4- Apoyo del supervisor |
| Dimensión 5 - Apoyo institucional |
| Dimensión 6 - Apoyo no relacionado con el trabajo |
| Dimensión 7- Autoeficacia profesional |
| Variable resultado 1 - Intención de cambio de trabajo |
| Variable resultado 2- Absentismo |
|  |
| Formas de apoyo deseadas |
|  |
| 1. ¿Ha estado implicado en algún incidente de seguridad? |
| 5.1. Con relación al último incidente de seguridad, ¿qué tipo de incidente fue? |
|  |
| 5.2. ¿Cuál fue su grado de implicación? |
| 5.3. ¿Cuándo sucedió? |
|  |
| 5.4. ¿¿Hubo fallecimiento o percepción de amenaza de muerte del paciente o lesiones graves? |
|  |
| 1. En el mes pasado, cuánto le ha molestado: |

Cuestionario PCL5. Cada ítem recibe una puntuación, según la escala de Likert. Los valores se puntúan desde 1 (totalmente de acuerdo) hasta 5 (totalmente en desacuerdo), pasándose por 3 como valor neutral, esto en dimensiones y variables. En formas de apoyo, los valores se puntúan desde 1 (muy deseado) hasta 5 (no deseado), pasándose por 3 como valor neutral. Con respecto a cuánto le ha molestado, los valores se puntúan desde 1 (mucho) hasta 4 (no del todo).
